# Supplementary material
Source: HighWire-hosted journal article supplement (https://bmjopen.bmj.com/content/10/3/e034296)
Supplement: inline-supplementary-material-2 [file inline-supplementary-material-2.pdf]

Supplementary File 2: Reported use of healthcare services and assistive devices in the 5-COOP countries, by place of living

|                                                                                      | Community-dwelling participants |                  |                   |                       |                   |                    | Participants living in an institution |                  |                  |                        |                   |                    |
|--------------------------------------------------------------------------------------|---------------------------------|------------------|-------------------|-----------------------|-------------------|--------------------|---------------------------------------|------------------|------------------|------------------------|-------------------|--------------------|
|                                                                                      | All<br>N = 657                  | Japan<br>N = 202 | France<br>N = 118 | Switzerland<br>N = 43 | Sweden<br>N = 158 | Denmark<br>N = 136 | All<br>N = 596                        | Japan<br>N = 144 | France<br>N = 94 | Switzerland<br>N = 127 | Sweden<br>N = 116 | Denmark<br>N = 115 |
| <b>Percentage (n/N) of respondents reporting...</b>                                  |                                 |                  |                   |                       |                   |                    |                                       |                  |                  |                        |                   |                    |
| one ore more medical visits during the last 3 months                                 | 54.0 (317/590)                  | 32.2 (48/149)    | 86.6 (97/112)     | 77.5 (31/40)          | 49.0 (76/156)     | 48.9 (65/133)      |                                       |                  |                  | n/a*                   |                   |                    |
| nursing care at home during the last 4 weeks                                         | 39.1 (216/543)                  | 17.6 (25/142)    | 39.1 (43/110)     | 53.9 (21/39)          | 57.1 (68/118)     | 44.0 (59/134)      |                                       |                  |                  | n/a*                   |                   |                    |
| home-delivered meals during the last 4 weeks                                         | 31.4 (176/558)                  | 4.2 (6/144)      | 22.7 (25/110)     | 42.9 (18/42)          | 33.6 (44/129)     | 62.4 (83/133)      |                                       |                  |                  | n/a*                   |                   |                    |
| one or more acute care hospital stays overnight during the last 12 months            | 18.9 (115/601)                  | 15.6 (24/154)    | 13.2 (15/114)     | 14.3 (6/42)           | 28.3 (44/158)     | 19.6 (26/133)      | 18.1 (97/536)                         | 17.1 (15/88)     | 12.9 (12/93)     | 19.8 (25/126)          | 18.4 (21/114)     | 20.9 (24/115)      |
| <b>Percentage (n/N) of respondents reporting a professional assessment for...</b>    |                                 |                  |                   |                       |                   |                    |                                       |                  |                  |                        |                   |                    |
| dental and oral health in the last 2 years                                           | 43.4 (271/614)                  | 31.3 (52/166)    | 37.3 (44/118)     | 42.9 (18/42)          | 56.0 (89/155)     | 51.1 (68/133)      | 46.6 (255/545)                        | 43.4 (43/99)     | 25.8 (24/93)     | 51.2 (64/125)          | 65.9 (74/114)     | 43.9 (50/114)      |
| eye and vision in the last 2 years                                                   | 43.5 (198/455)                  | 29.1 (48/165)    | 41.5 (49/118)     | 59.5 (25/42)          | n/a               | 58.5 (76/130)      | 34.5 (146/423)                        | 18.2 (18/99)     | 27.7 (26/94)     | 46.4 (58/125)          | n/a               | 41.9 (44/105)      |
| hearing in the last 2 years                                                          | 30.4 (139/457)                  | 12.2 (20/164)    | 28.8 (34/118)     | 50.0 (21/42)          | n/a               | 48.1 (64/133)      | 30.2 (130/431)                        | 9.2 (9/98)       | 23.4 (22/94)     | 46.4 (58/125)          | n/a               | 36.0 (41/114)      |
| blood pressure in the last year                                                      | 82.9 (378/456)                  | 89.6 (146/163)   | 97.4 (114/117)    | 97.7 (42/43)          | n/a               | 57.1 (76/133)      | 80.1 (347/433)                        | 88.1 (89/101)    | 93.6 (88/94)     | 100.0 (125/125)        | n/a               | 39.8 (45/113)      |
| weight in the last year                                                              | 63.5 (290/457)                  | 73.8 (121/164)   | 89.7 (105/117)    | 95.4 (41/43)          | n/a               | 17.3 (23/133)      | 75.9 (328/432)                        | 86.9 (86/99)     | 90.4 (85/94)     | 100.0 (125/125)        | n/a               | 28.1 (32/114)      |
| nursing care, home help and social care needs in the last year                       | 56.9 (211/371)                  | 46.8 (73/156)    | 74.4 (29/39)      | 83.7 (36/43)          | n/a               | 54.9 (73/133)      | 69.8 (250/358)                        | 44.9 (40/89)     | 67.5 (27/40)     | 100.0 (124/124)        | n/a               | 56.2 (59/105)      |
| <b>Percentage (n/N) of respondents using a mobility device to get around indoors</b> |                                 |                  |                   |                       |                   |                    |                                       |                  |                  |                        |                   |                    |
| no device                                                                            | 35.1 (212/605)                  | 45.4 (79/174)    | 42.1 (48/114)     | 29.0 (9/31)           | 19.7 (33/154)     | 32.6 (43/132)      | 7.4 (39/528)                          | 7.1 (8/112)      | 17.7 (15/85)     | 6.7 (7/105)            | 6.1 (7/113)       | 1.8 (2/113)        |
| cane(s), quadripod(s), crutch(es) or walker                                          | 49.0 (298/605)                  | 27.0 (47/174)    | 42.1 (48/114)     | 61.3 (19/31)          | 65.2 (99/154)     | 64.4 (85/132)      | 41.1 (219/528)                        | 8.9 (10/112)     | 30.6 (26/85)     | 47.6 (50/105)          | 46.5 (54/113)     | 69.9 (79/113)      |
| wheelchair                                                                           | 13.8 (82/605)                   | 21.3 (37/174)    | 15.8 (18/114)     | 9.7 (3/31)            | 14.0 (20/154)     | 3.0 (4/132)        | 48.0 (252/528)                        | 69.6 (78/112)    | 51.8 (44/85)     | 45.7 (48/105)          | 45.4 (50/113)     | 28.3 (32/113)      |
| bedridden                                                                            | 2.2 (13/605)                    | 6.3 (11/174)     | 0.0 (0/114)       | 0.0 (0/31)            | 1.2 (2/154)       | 0.0 (0/132)        | 3.5 (18/528)                          | 14.3 (16/112)    | 0.0 (0/85)       | 0.0 (0/105)            | 2.0 (2/113)       | 0.0 (0/113)        |
| <b>Percentage (n/N) of respondents using a mobility device when going outdoors</b>   |                                 |                  |                   |                       |                   |                    |                                       |                  |                  |                        |                   |                    |
| no device                                                                            | 14.3 (80/564)                   | 15.0 (26/173)    | 23.7 (22/93)      | 11.1 (3/27)           | 5.9 (10/153)      | 16.1 (19/118)      | 3.8 (18/476)                          | 0.9 (1/112)      | 11.6 (8/69)      | 7.2 (6/83)             | 1.5 (2/115)       | 1.0 (1/97)         |
| cane(s), quadripod(s), crutch(es) or walker                                          | 57.6 (327/564)                  | 32.4 (56/173)    | 65.6 (61/93)      | 77.8 (21/27)          | 60.5 (94/153)     | 80.5 (95/118)      | 34.2 (164/476)                        | 8.9 (10/112)     | 30.4 (21/69)     | 43.4 (36/83)           | 32.7 (39/115)     | 59.8 (58/97)       |
| wheelchair                                                                           | 23.2 (129/564)                  | 45.7 (79/173)    | 10.8 (10/93)      | 11.1 (3/27)           | 22.9 (33/153)     | 3.4 (4/118)        | 51.6 (244/476)                        | 65.2 (73/112)    | 58.0 (40/69)     | 49.4 (41/83)           | 46.3 (52/115)     | 39.2 (38/97)       |
| never going outdoors                                                                 | 4.8 (28/564)                    | 6.9 (12/173)     | 0.0 (0/93)        | 0.0 (0/27)            | 10.7 (16/153)     | 0.0 (0/118)        | 10.4 (50/476)                         | 25.0 (28/112)    | 0.0 (0/69)       | 0.0 (0/83)             | 19.5 (22/115)     | 0.0 (0/97)         |
| <b>Percentage (n/N) of respondents having...</b>                                     |                                 |                  |                   |                       |                   |                    |                                       |                  |                  |                        |                   |                    |
| glasses or contact lenses                                                            | 83.1 (495/595)                  | 74.3 (130/175)   | 92.3 (108/117)    | 87.1 (27/31)          | 86.2 (119/138)    | 82.8 (111/134)     | 70.8 (375/530)                        | 52.4 (54/103)    | 78.4 (69/88)     | 68.2 (75/110)          | 83.8 (94/114)     | 72.2 (83/115)      |
| hearing aids                                                                         | 48.6 (295/609)                  | 31.8 (54/170)    | 43.1 (50/116)     | 67.7 (21/31)          | 54.2 (83/157)     | 64.4 (87/135)      | 45.1 (239/531)                        | 20.4 (21/103)    | 38.6 (34/88)     | 44.6 (49/110)          | 55.5 (62/115)     | 63.5 (73/115)      |
| dentures (partial or total)                                                          | 75.6 (455/608)                  | 87.1 (149/171)   | 83.6 (97/116)     | 74.2 (23/31)          | 57.2 (88/156)     | 73.1 (98/134)      | 76.5 (401/526)                        | 77.7 (80/103)    | 75.0 (66/88)     | 78.2 (86/110)          | 66.0 (73/111)     | 84.2 (96/114)      |
| a bath chair                                                                         | 53.7 (313/576)                  | 41.5 (66/159)    | 39.7 (46/116)     | 45.2 (14/31)          | 72.7 (100/137)    | 65.4 (87/133)      | 73.9 (382/515)                        | 36.3 (33/91)     | 59.3 (51/86)     | 81.8 (90/110)          | 91.4 (103/113)    | 91.3 (105/115)     |
| an elevated toilet seat                                                              | 37.3 (217/571)                  | 12.5 (19/152)    | 32.8 (38/116)     | 35.5 (11/31)          | 68.7 (93/138)     | 41.8 (56/134)      | 53.1 (273/507)                        | 8.2 (7/85)       | 44.7 (38/85)     | 50.9 (56/110)          | 82.7 (95/114)     | 68.1 (77/113)      |
| a handle                                                                             | 36.9 (214/577)                  | 15.3 (24/157)    | 33.6 (39/116)     | 45.2 (14/31)          | 45.2 (62/138)     | 55.6 (75/135)      | 57.5 (292/505)                        | 26.3 (21/80)     | 61.6 (53/86)     | 66.4 (73/110)          | 71.0 (82/115)     | 55.3 (63/114)      |
| a bannister                                                                          | 40.2 (227/581)                  | 68.5 (113/165)   | 33.0 (38/115)     | 19.4 (6/31)           | 10.3 (13/137)     | 42.9 (57/133)      | 65.2 (332/513)                        | 65.9 (60/91)     | 64.0 (55/86)     | 70.9 (78/110)          | 32.3 (37/112)     | 89.5 (102/114)     |
| a lifting pole                                                                       | 18.4 (104/572)                  | 19.5 (30/154)    | 20.7 (24/116)     | 12.9 (4/31)           | 18.3 (24/138)     | 16.5 (22/133)      | 55.4 (286/509)                        | 18.3 (15/82)     | 41.4 (36/87)     | 90.9 (100/110)         | 92.2 (107/116)    | 24.6 (28/114)      |
| a medical bed                                                                        | 36.7 (163/444)                  | 45.7 (79/173)    | 32.5 (37/114)     | 27.3 (6/22)           | n/a               | 30.4 (41/135)      | 88.2 (367/416)                        | 77.7 (80/103)    | 81.1 (73/90)     | 98.2 (107/109)         | n/a               | 93.9 (107/114)     |
| an alarm                                                                             | 50.3 (299/582)                  | 17.2 (28/163)    | 31.9 (37/116)     | 54.8 (17/31)          | 90.7 (124/138)    | 69.4 (93/134)      | 80.0 (417/520)                        | 66.0 (62/94)     | 78.4 (69/88)     | 73.6 (81/110)          | 88.5 (100/113)    | 91.3 (105/115)     |

Percentage can subtly differ from ratio because results for Sweden and all countries are weighted to account for oversampling of Swedish male participants

\* Outcomes measured among community-dwelling participants only
